# Supplementary material for: “Comparative Analysis of Glycoproteomic Software Using a Tailored Glycan Database”
Source: PubMed Central journal article supplement — bioRxiv. 2024 Jul 25:2024.07.24.604997. Preprint. [Version 1] doi: 10.1101/2024.07.24.604997 (PMC11291120; doi:10.1101/2024.07.24.604997), 2024-07-25

**Supplementary Information for:**

## Comparative Analysis of Glycoproteomic Software Using a Tailored Glycan Database

Reuben A. Hogan<sup>1</sup>, Lauren E. Pepi<sup>2</sup>, Nicholas M. Riley<sup>3</sup>, Robert J. Chalkley<sup>1</sup>

<sup>1</sup>University of California, San Francisco, <sup>2</sup>Beth Israel Deaconess Medical Center, Harvard Medical School, <sup>3</sup>University of Washington

**PDF includes:**

Supplementary Tables 1 to 2

Supplementary Figures 1 to 6

**Supplementary Table 1: Functional Enrichment Results for All Peptides Identified by MaxQuant.** Results were filtered by the UniProt Keywords category and sorted by FDR value.

| # background genes | # genes | description                   | FDR value | p-value   |
|--------------------|---------|-------------------------------|-----------|-----------|
| 8122               | 4237    | Phosphoprotein                | 1.06E-298 | 1.58E-301 |
| 3362               | 2476    | Acetylation                   | 2.24E-278 | 6.66E-281 |
| 5095               | 2419    | Cytoplasm                     | 1.03E-80  | 4.61E-83  |
| 1717               | 1072    | Isopeptide bond               | 2.68E-70  | 1.60E-72  |
| 2399               | 1344    | Ubl conjugation               | 3.46E-68  | 2.57E-70  |
| 5278               | 2413    | Nucleus                       | 4.84E-68  | 4.32E-70  |
| 10313              | 3926    | Alternative splicing          | 8.74E-48  | 9.10E-50  |
| 1181               | 719     | Mitochondrion                 | 1.61E-42  | 1.91E-44  |
| 686                | 481     | RNA-binding                   | 1.90E-38  | 2.55E-40  |
| 617                | 433     | Protein transport             | 1.55E-34  | 2.31E-36  |
| 973                | 583     | Methylation                   | 1.21E-32  | 1.99E-34  |
| 545                | 382     | Transit peptide               | 2.67E-30  | 4.77E-32  |
| 278                | 236     | Ribonucleoprotein             | 3.43E-26  | 6.64E-28  |
| 349                | 271     | mRNA processing               | 5.65E-26  | 1.18E-27  |
| 1776               | 859     | Nucleotide-binding            | 1.74E-24  | 3.89E-26  |
| 274                | 225     | mRNA splicing                 | 1.02E-23  | 2.43E-25  |
| 1379               | 673     | ATP-binding                   | 1.69E-19  | 4.28E-21  |
| 175                | 154     | Ribosomal protein             | 4.44E-18  | 1.19E-19  |
| 540                | 322     | Host-virus interaction        | 1.71E-17  | 4.85E-19  |
| 2166               | 931     | Coiled coil                   | 5.35E-15  | 1.59E-16  |
| 138                | 121     | Spliceosome                   | 3.63E-14  | 1.13E-15  |
| 349                | 221     | Neurodegeneration             | 5.91E-14  | 1.93E-15  |
| 292                | 195     | Chromatin regulator           | 6.18E-14  | 2.16E-15  |
| 1235               | 578     | Cytoskeleton                  | 6.18E-14  | 2.12E-15  |
| 651                | 345     | Cell cycle                    | 2.81E-13  | 1.04E-14  |
| 128                | 108     | Protein biosynthesis          | 5.35E-12  | 2.07E-13  |
| 197                | 142     | Chaperone                     | 5.94E-12  | 2.39E-13  |
| 384                | 225     | Cell division                 | 9.84E-12  | 4.10E-13  |
| 157                | 121     | Primary mitochondrial disease | 1.39E-11  | 6.00E-13  |
| 95                 | 87      | rRNA processing               | 5.20E-11  | 2.32E-12  |
| 1978               | 816     | Transport                     | 3.80E-10  | 1.76E-11  |
| 282                | 172     | WD repeat                     | 4.91E-10  | 2.34E-11  |
| 433                | 236     | Chromosome                    | 5.05E-10  | 2.48E-11  |

|      |     |                              |          |          |
|------|-----|------------------------------|----------|----------|
| 297  | 175 | Mitochondrion inner membrane | 2.35E-09 | 1.19E-10 |
| 141  | 103 | Helicase                     | 4.98E-09 | 2.59E-10 |
| 275  | 163 | Mitosis                      | 6.91E-09 | 3.70E-10 |
| 83   | 73  | Ribosome biogenesis          | 8.06E-09 | 4.44E-10 |
| 105  | 84  | mRNA transport               | 9.93E-09 | 5.62E-10 |
| 386  | 208 | DNA damage                   | 1.33E-08 | 7.71E-10 |
| 1820 | 736 | Transferase                  | 5.37E-08 | 3.20E-09 |
| 325  | 178 | DNA repair                   | 8.54E-08 | 5.24E-09 |
| 1612 | 660 | Hydrolase                    | 8.54E-08 | 5.21E-09 |
| 91   | 71  | ER-Golgi transport           | 3.69E-07 | 2.36E-08 |
| 695  | 316 | Ubl conjugation pathway      | 8.98E-07 | 5.88E-08 |
| 131  | 88  | Ligase                       | 1.19E-06 | 7.97E-08 |
| 568  | 265 | Endosome                     | 1.95E-06 | 1.33E-07 |
| 86   | 65  | Translocation                | 2.91E-06 | 2.04E-07 |
| 138  | 88  | Centromere                   | 5.79E-06 | 4.14E-07 |
| 108  | 74  | Neuropathy                   | 6.59E-06 | 4.81E-07 |
| 52   | 46  | Proteasome                   | 8.41E-06 | 6.26E-07 |
| 98   | 68  | DNA replication              | 1.31E-05 | 9.95E-07 |
| 1168 | 476 | Endoplasmic reticulum        | 1.64E-05 | 1.27E-06 |
| 117  | 76  | Translation regulation       | 1.89E-05 | 1.49E-06 |
| 100  | 68  | Kinetochores                 | 2.06E-05 | 1.66E-06 |
| 53   | 45  | Nuclear pore complex         | 2.15E-05 | 1.76E-06 |
| 107  | 71  | Electron transport           | 2.25E-05 | 1.87E-06 |
| 271  | 139 | Actin-binding                | 4.14E-05 | 3.56E-06 |
| 38   | 36  | Aminoacyl-tRNA synthetase    | 4.14E-05 | 3.58E-06 |
| 63   | 49  | Respiratory chain            | 4.14E-05 | 3.51E-06 |
| 578  | 257 | Magnesium                    | 4.20E-05 | 3.75E-06 |
| 280  | 142 | Microtubule                  | 4.88E-05 | 4.43E-06 |
| 570  | 253 | Oxidoreductase               | 5.33E-05 | 4.91E-06 |
| 611  | 266 | Repressor                    | 9.29E-05 | 8.71E-06 |
| 90   | 60  | tRNA processing              | 1.10E-04 | 1.02E-05 |
| 47   | 39  | Initiation factor            | 1.20E-04 | 1.21E-05 |
| 131  | 78  | Isomerase                    | 1.20E-04 | 1.16E-05 |
| 125  | 74  | Mitochondrion outer membrane | 2.20E-04 | 2.20E-05 |
| 51   | 39  | Redox-active center          | 4.30E-04 | 4.34E-05 |

|      |      |                                      |          |          |
|------|------|--------------------------------------|----------|----------|
| 312  | 145  | Chromosomal rearrangement            | 9.60E-04 | 9.90E-05 |
| 55   | 39   | Charcot-Marie-Tooth disease          | 0.0013   | 1.40E-04 |
| 2369 | 860  | Transcription                        | 0.0013   | 1.40E-04 |
| 37   | 30   | DNA-directed RNA polymerase          | 0.0015   | 1.60E-04 |
| 879  | 349  | Golgi apparatus                      | 0.0015   | 1.60E-04 |
| 595  | 248  | Cytoplasmic vesicle                  | 0.0015   | 1.60E-04 |
| 342  | 154  | GTP-binding                          | 0.0018   | 2.00E-04 |
| 163  | 83   | TPR repeat                           | 0.0031   | 3.50E-04 |
| 156  | 80   | Autophagy                            | 0.0033   | 3.80E-04 |
| 34   | 27   | Amyotrophic lateral sclerosis        | 0.0035   | 4.10E-04 |
| 30   | 25   | Nonsense-mediated mRNA decay         | 0.0035   | 4.10E-04 |
| 534  | 221  | Apoptosis                            | 0.0039   | 4.70E-04 |
| 27   | 23   | tRNA-binding                         | 0.0046   | 5.60E-04 |
| 634  | 255  | Kinase                               | 0.0055   | 6.70E-04 |
| 186  | 90   | Methyltransferase                    | 0.0059   | 7.30E-04 |
| 212  | 99   | Epilepsy                             | 0.0082   | 0.001    |
| 25   | 21   | Amino-acid biosynthesis              | 0.0083   | 0.0011   |
| 128  | 66   | Endocytosis                          | 0.0083   | 0.001    |
| 35   | 26   | Leukodystrophy                       | 0.0083   | 0.001    |
| 55   | 35   | RNA-mediated gene silencing          | 0.0092   | 0.0012   |
| 175  | 84   | S-adenosyl-L-methionine              | 0.0097   | 0.0013   |
| 390  | 164  | Serine/threonine-protein kinase      | 0.0104   | 0.0014   |
| 26   | 21   | rRNA-binding                         | 0.0112   | 0.0015   |
| 35   | 25   | Rotamase                             | 0.0139   | 0.0019   |
| 120  | 61   | Flavoprotein                         | 0.0147   | 0.002    |
| 3702 | 1274 | Metal-binding                        | 0.0156   | 0.0022   |
| 51   | 32   | Coated pit                           | 0.0158   | 0.0022   |
| 251  | 111  | Lipid-binding                        | 0.0158   | 0.0022   |
| 58   | 35   | Hereditary spastic paraplegia        | 0.0162   | 0.0023   |
| 2299 | 811  | Transcription regulation             | 0.0174   | 0.0025   |
| 45   | 29   | Congenital disorder of glycosylation | 0.0181   | 0.0027   |
| 66   | 38   | Citrullination                       | 0.0192   | 0.0029   |
| 39   | 26   | Bromodomain                          | 0.0206   | 0.0031   |
| 103  | 53   | Peroxisome                           | 0.0209   | 0.0032   |

|     |     |                                     |        |        |
|-----|-----|-------------------------------------|--------|--------|
| 23  | 18  | Tricarboxylic acid cycle            | 0.0265 | 0.0041 |
| 19  | 16  | Diamond-Blackfan anemia             | 0.0265 | 0.0041 |
| 108 | 54  | FAD                                 | 0.0293 | 0.0046 |
| 59  | 34  | Iron-sulfur                         | 0.0293 | 0.0046 |
| 50  | 30  | Exonuclease                         | 0.0307 | 0.0049 |
| 184 | 83  | NAD                                 | 0.0311 | 0.005  |
| 74  | 40  | Multifunctional enzyme              | 0.0317 | 0.0051 |
| 684 | 261 | Activator                           | 0.0323 | 0.0053 |
| 127 | 61  | Nuclease                            | 0.0325 | 0.0054 |
| 117 | 57  | Alternative initiation              | 0.0333 | 0.0056 |
| 164 | 75  | Guanine-nucleotide releasing factor | 0.0338 | 0.0057 |
| 167 | 76  | Prenylation                         | 0.0349 | 0.0059 |
| 47  | 28  | Allosteric enzyme                   | 0.0402 | 0.0069 |
| 190 | 84  | GTPase activation                   | 0.041  | 0.0071 |
| 19  | 15  | One-carbon metabolism               | 0.0458 | 0.008  |
| 17  | 14  | Mitochondrion nucleoid              | 0.0458 | 0.008  |
| 170 | 76  | NADP                                | 0.0463 | 0.0082 |

**Supplementary Table 2: Glycans Identified in Glycomic Profiling.**

| GlyTouCan | Composition                                | Structure                                                                            | Percent Abundance |
|-----------|--------------------------------------------|--------------------------------------------------------------------------------------|-------------------|
| G40702WU  | (Hex)5 + (Man)3(GlcNAc)2                   | 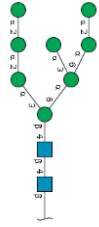   | 36.58%            |
| G60230HH  | (Hex)6 + (Man)3(GlcNAc)2                   |    | 25.65%            |
| G55220VL  | (Hex)2 + (Man)3(GlcNAc)2                   |   | 8.51%             |
| G82933ZI  | (HexNAc)4 (Deoxyhexose)1 + (Man)3(GlcNAc)2 |  | 7.01%             |
| G89993FE  | (Hex)1 (HexNAc)2 + (Man)3(GlcNAc)2         |  | 3.10%             |
| G22573RC  | (Man)2 (GlcNAc)2                           |  | 2.37%             |

|          |                                                   |                                                                                       |       |
|----------|---------------------------------------------------|---------------------------------------------------------------------------------------|-------|
| G69411IG | (Hex)1 (HexNAc)1 + (Man)3(GlcNAc)2                | 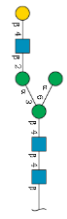   | 1.70% |
| G20030CU | (HexNAc)4 + (Man)3(GlcNAc)2                       |    | 1.29% |
| G22768VO | (Man)3 (GlcNAc)2                                  |    | 1.25% |
| G25520XG | (HexNAc)3 (Hex)2 (Deoxyhexose)1 + (Man)3(GlcNAc)2 |   | 1.23% |
| G80966KZ | (Hex)3 + (Man)3(GlcNAc)2                          |  | 1.07% |
| G04216GB | (Hex)4 + (Man)3(GlcNAc)2                          |  | 1.02% |

|          |                                             |                                                                                      |       |
|----------|---------------------------------------------|--------------------------------------------------------------------------------------|-------|
| G65890UA | (Hex)3 (HexNAc)1 (NeuAc)1 + (Man)3(GlcNAc)2 | 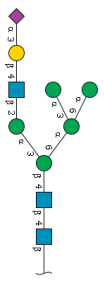   | 0.79% |
| G04576KS | (Hex)3 (HexNAc)1 (NeuAc)1 + (Man)3(GlcNAc)2 |    | 0.75% |
| G43677TG | (HexNAc)2 (Hex)1 + (Man)3(GlcNAc)2          |   | 0.75% |
| G30588SI | (HexNAc)2 (Hex)2 + (Man)3(GlcNAc)2          |  | 0.66% |
| G04414GO | (Hex)4 + (Man)3(GlcNAc)2                    |  | 0.60% |
| G20966TZ | (Hex)2 (HexNAc)2 + (Man)3(GlcNAc)2          |  | 0.59% |



|          |                                                                                                                |                                                                                       |       |
|----------|----------------------------------------------------------------------------------------------------------------|---------------------------------------------------------------------------------------|-------|
| G82942ZJ | (Hex) <sup>2</sup> (HexNAc) <sup>1</sup> (Deoxyhexose) <sup>1</sup> + (Man) <sup>3</sup> (GlcNAc) <sup>2</sup> | 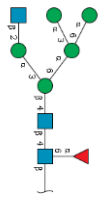    | 0.53% |
| G07617FP | (Hex) <sup>2</sup> + (Man) <sup>3</sup> (GlcNAc) <sup>2</sup>                                                  |    | 0.43% |
| G10219AA | (HexNAc) <sup>3</sup> + (Man) <sup>3</sup> (GlcNAc) <sup>2</sup>                                               |     | 0.39% |
| G29011JC | (HexNAc) <sup>3</sup> + (Man) <sup>3</sup> (GlcNAc) <sup>2</sup>                                               |    | 0.38% |
| G59471TH | (HexNAc) <sup>3</sup> + (Man) <sup>3</sup> (GlcNAc) <sup>2</sup>                                               |   | 0.36% |
| G42227JK | (Man) <sup>3</sup> (GlcNAc) <sup>2</sup>                                                                       |  | 0.35% |
| G30159WR | (HexNAc) <sup>3</sup> (Deoxyhexose) <sup>1</sup> + (Man) <sup>3</sup> (GlcNAc) <sup>2</sup>                    |   | 0.34% |

|          |                                                   |                                                                                      |       |
|----------|---------------------------------------------------|--------------------------------------------------------------------------------------|-------|
| G16828VN | (Hex)3 (HexNAc)1 + (Man)3(GlcNAc)2                | 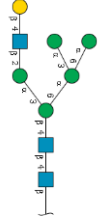   | 0.27% |
| G04675YX | (Hex)2 (HexNAc)2 (Deoxyhexose)1 + (Man)3(GlcNAc)2 |    | 0.22% |
| G52934AK | (HexNAc)3 (Hex)2 + (Man)3(GlcNAc)2                |    | 0.22% |
| G06374YY | (Hex)3 (HexNAc)1 (Deoxyhexose)1 + (Man)3(GlcNAc)2 |   | 0.21% |
| G56014GC | (Hex)1 + (Man)3(GlcNAc)2                          |  | 0.21% |
| G36191CD | (Hex)2 (HexNAc)2 + (Man)3(GlcNAc)2                |  | 0.20% |
| G80858MF | (HexNAc)2 (Deoxyhexose)1 + (Man)3(GlcNAc)2        |  | 0.14% |

|          |                                                   |                                                                                       |       |
|----------|---------------------------------------------------|---------------------------------------------------------------------------------------|-------|
| G02763QD | (Hex)1 + (Man)3(GlcNAc)2                          |    | 0.13% |
| G64481DJ | (HexNAc)1 + (Man)3(GlcNAc)2                       |    | 0.11% |
| G91365ZQ | (Hex)2 (HexNAc)2 (NeuAc)1 + (Man)3(GlcNAc)2       |    | 0.11% |
| G27919IH | (HexNAc)2 (Hex)1 (Deoxyhexose)1 + (Man)3(GlcNAc)2 |   | 0.09% |
| G68668TB | (Hex)4 + (Man)3(GlcNAc)2                          |  | 0.09% |
| G92024SL | (HexNAc)2 + (Man)3(GlcNAc)2                       |  | 0.08% |

|          |                                             |                                                                                       |       |
|----------|---------------------------------------------|---------------------------------------------------------------------------------------|-------|
| G01760ZU | (Hex)1 + (Man)3(GlcNAc)2                    |    | 0.04% |
| G61751GZ | (HexNAc)1 + (Man)3(GlcNAc)2                 |    | 0.03% |
| G83161QT | (Hex)4 + (Man)3(GlcNAc)2                    |     | 0.03% |
| G00176HZ | (HexNAc)4 (Deoxyhexose)1 + (Man)3(GlcNAc)2  |    | 0.02% |
| G40358EZ | (HexNAc)5 (Deoxyhexose)1 + (Man)3(GlcNAc)2  |   | 0.02% |
| G45560HM | (Hex)2 (HexNAc)2 (NeuAc)1 + (Man)3(GlcNAc)2 |  | 0.02% |
| G82348BZ | (Deoxyhexose)1 + (Man)3(GlcNAc)2            |   | 0.02% |

|          |                                                               |  |       |
|----------|---------------------------------------------------------------|--|-------|
| G17473NR | (Hex)2 (HexNAc)3 (NeuAc)2<br>(Deoxyhexose)1 + (Man)3(GlcNAc)2 |  | 0.01% |
| G38117WE | (Hex)1 (HexNAc)2 (NeuAc)1<br>(Deoxyhexose)1 + (Man)3(GlcNAc)2 |  | 0.01% |
| G50078RT | (HexNAc)4 (Hex)3 + (Man)3(GlcNAc)2                            |  | 0.01% |
| G84467IZ | (Hex)2 (HexNAc)2 (NeuAc)2 +<br>(Man)3(GlcNAc)2                |  | 0.01% |
| G07483YN | (HexNAc)1 (Deoxyhexose)1 +<br>(Man)3(GlcNAc)2                 |  | 0.00% |
| G08997GC | (Hex)2 (HexNAc)2 (NeuAc)2 +<br>(Man)3(GlcNAc)2                |  | 0.00% |

|          |                                                                  |                                                                                     |       |
|----------|------------------------------------------------------------------|-------------------------------------------------------------------------------------|-------|
| G39213VZ | (HexNAc) <sub>2</sub> + (Man) <sub>3</sub> (GlcNAc) <sub>2</sub> | 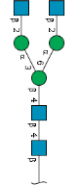 | 0.00% |
|----------|------------------------------------------------------------------|-------------------------------------------------------------------------------------|-------|

**Supplementary Figure 1: Number of GPSMs Found by Fraction.**

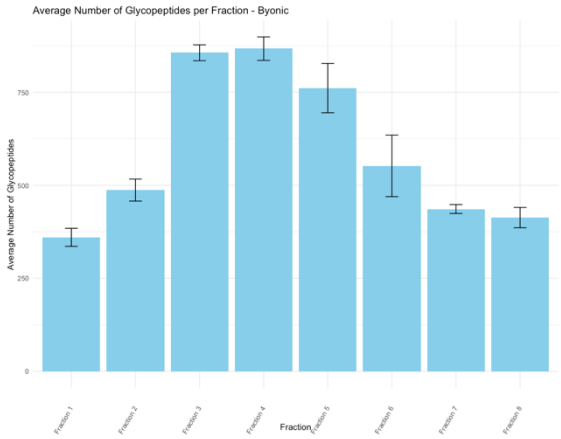

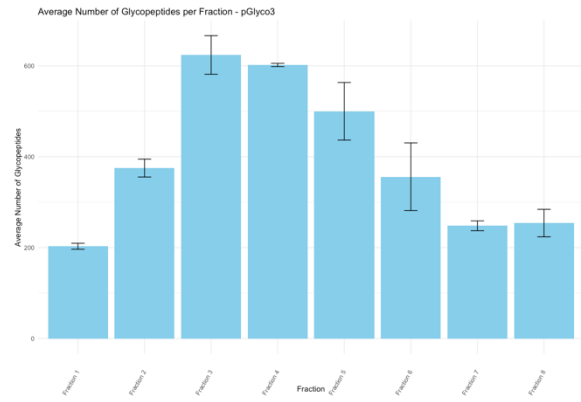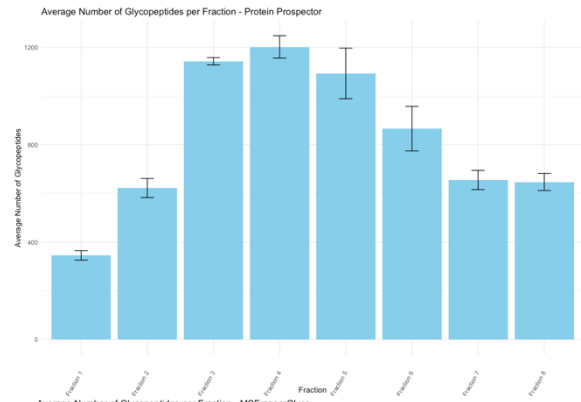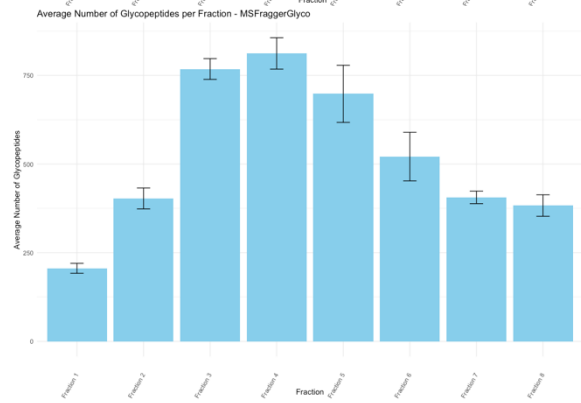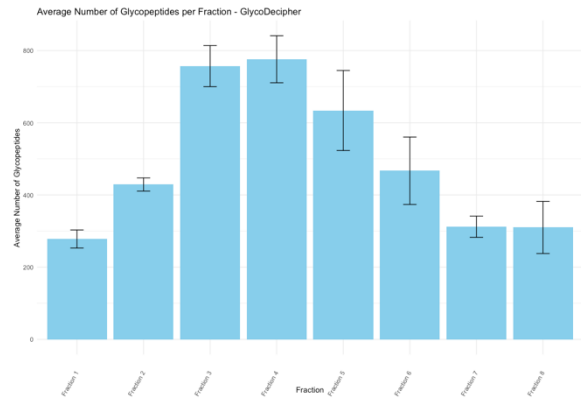



**Supplementary Figure 2: Annotated spectra for five glycoforms of the peptide VQGNSTLLHITDLQAR from Immunoglobulin superfamily member 3.** Only the mass region from  $m/z$  400 up is shown to spread out peaks and reduce overlaying of assignments (prominent HexNAc and HexNAcHex oxonium ions were seen in the missing low mass region for all these spectra). The HexNAc<sub>5</sub>Hex<sub>4</sub>Fuc glycoform was identified by multiple software, but the other glycoforms were only reported by Protein Prospector.

**VQGN(HexNAc5Hex4Fuc\*)STLLHITDLQAR<sup>+3</sup>**

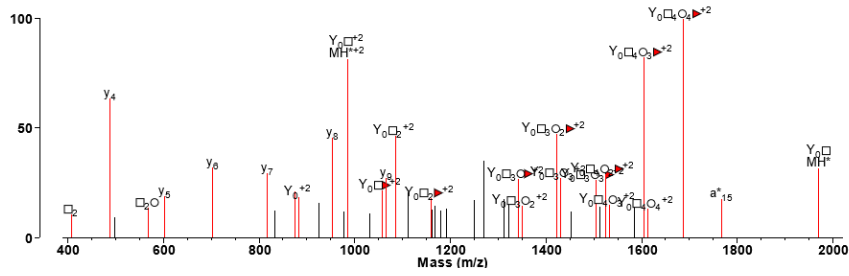

**VQGN(HexNAc4Hex4\*)STLLHITDLQAR<sup>+3</sup>**

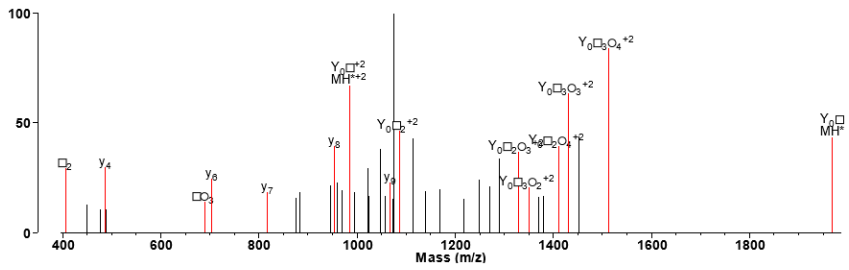

**VQGN(HexNAc4Hex4Fuc\*)STLLHITDLQAR<sup>+3</sup>**

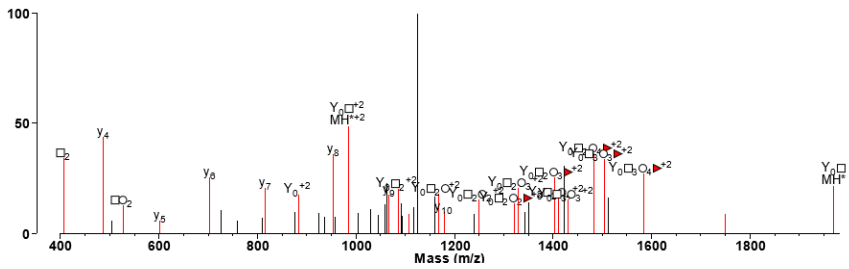

**VQGN(HexNAc5Hex4\*)STLLHITDLQAR<sup>+3</sup>**

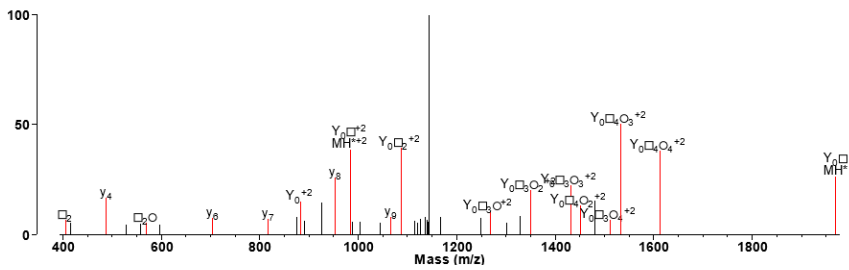

**VQGN(HexNAc2Hex5\*)STLLHITDLQAR<sup>+3</sup>**

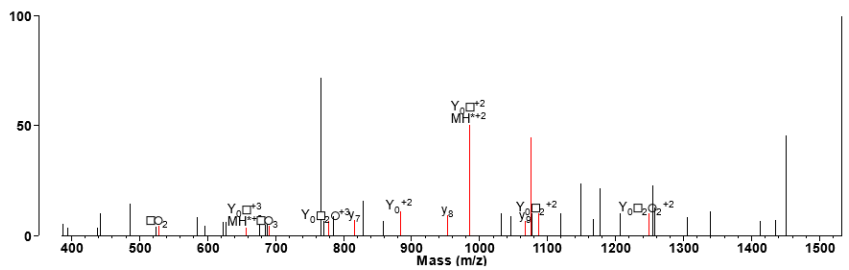

### Supplementary Figure 3: UniProtIDs with the Most Glycosites as Determined in Each Software.

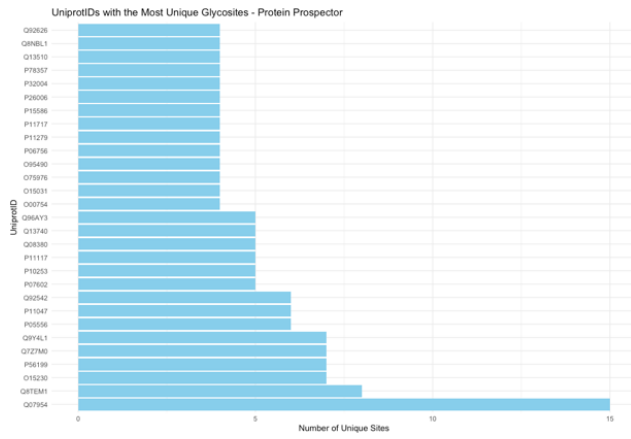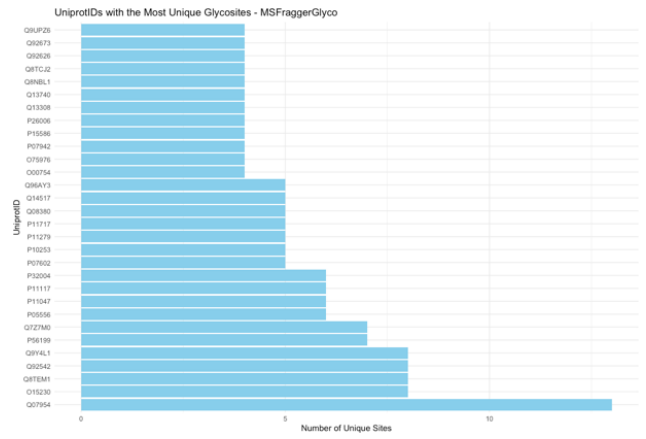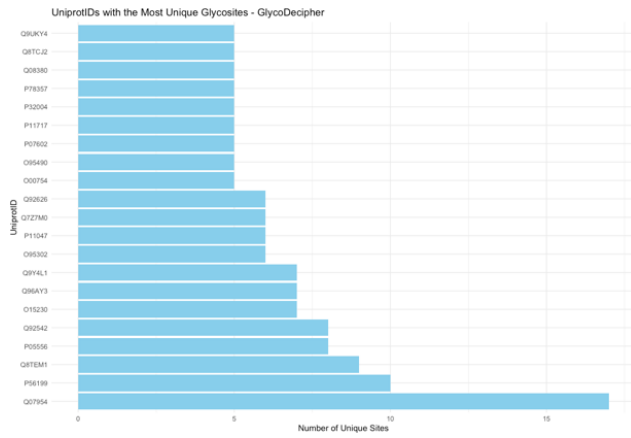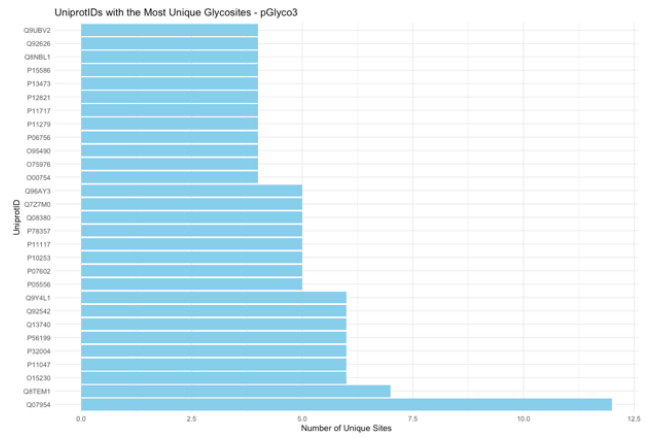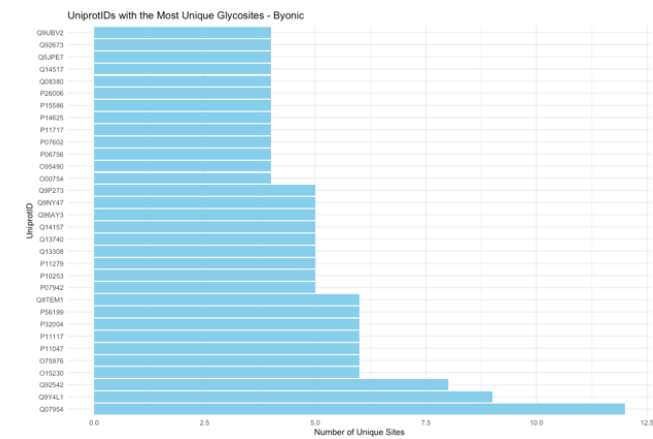

# Supplementary Figure 4: Percentage of Multi-Fucosylated Glycopeptides by Software

Percent of Multi-Fucosylated Glycopeptides - Byonic

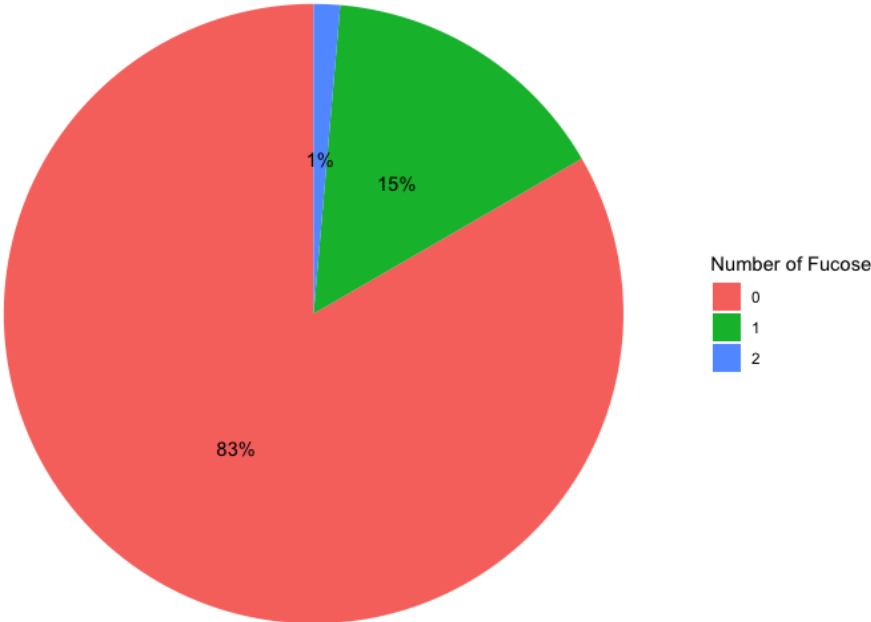

Percent of Multi-Fucosylated Glycopeptides - Protein Prospector

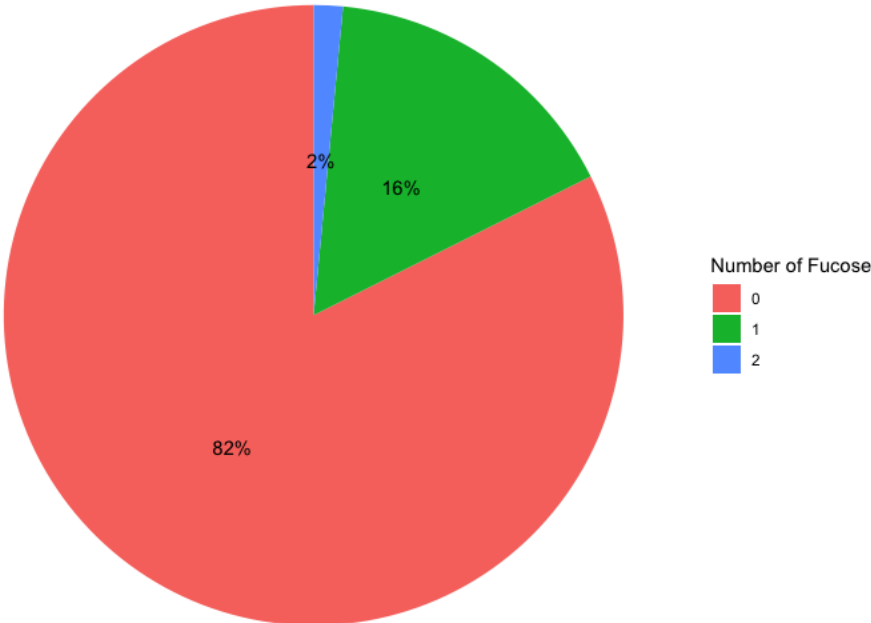

Percent of Multi-Fucosylated Glycopeptides - MSFraggerGlyco

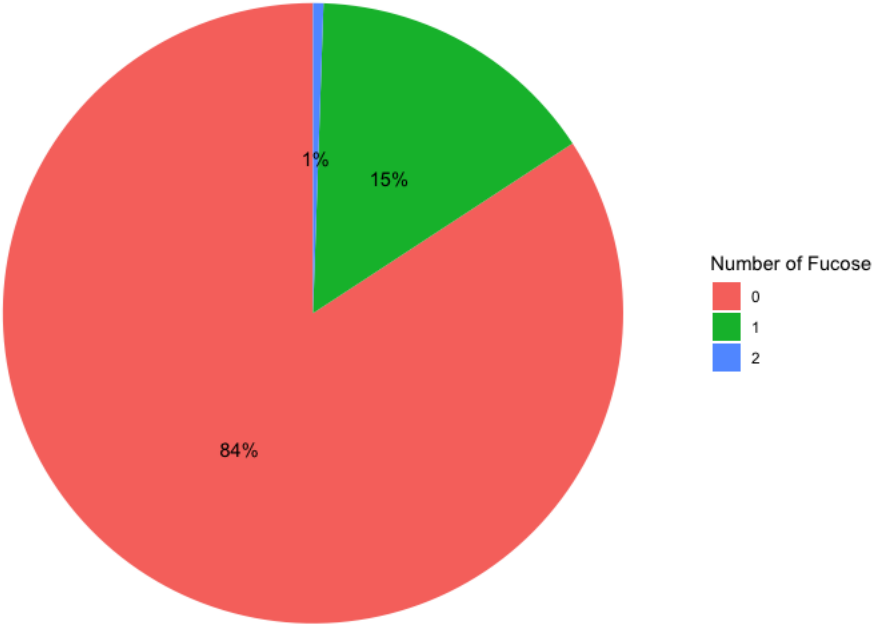

Percent of Multi-Fucosylated Glycopeptides - pGlyco3

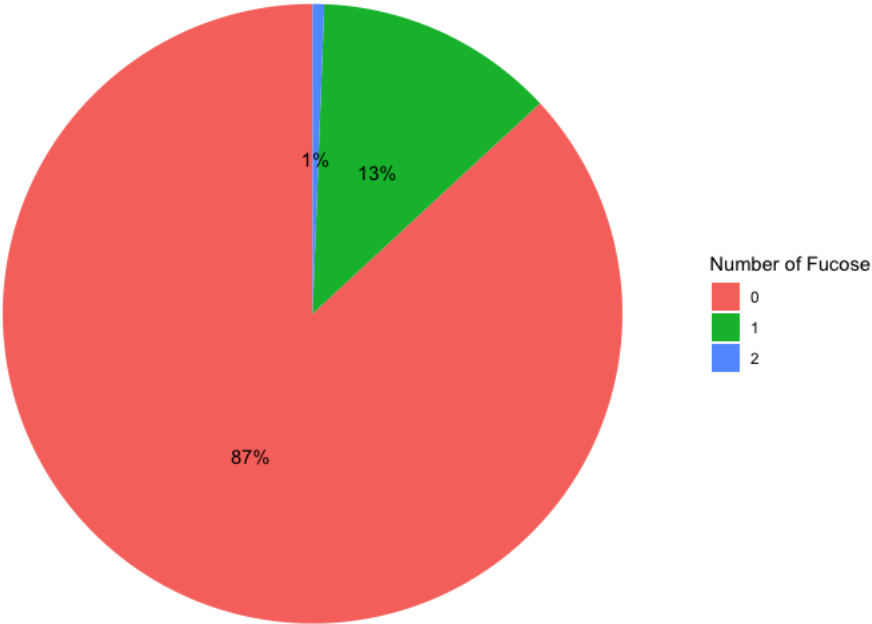

Percent of Multi-Fucosylated Glycopeptides - GlycoDecipher

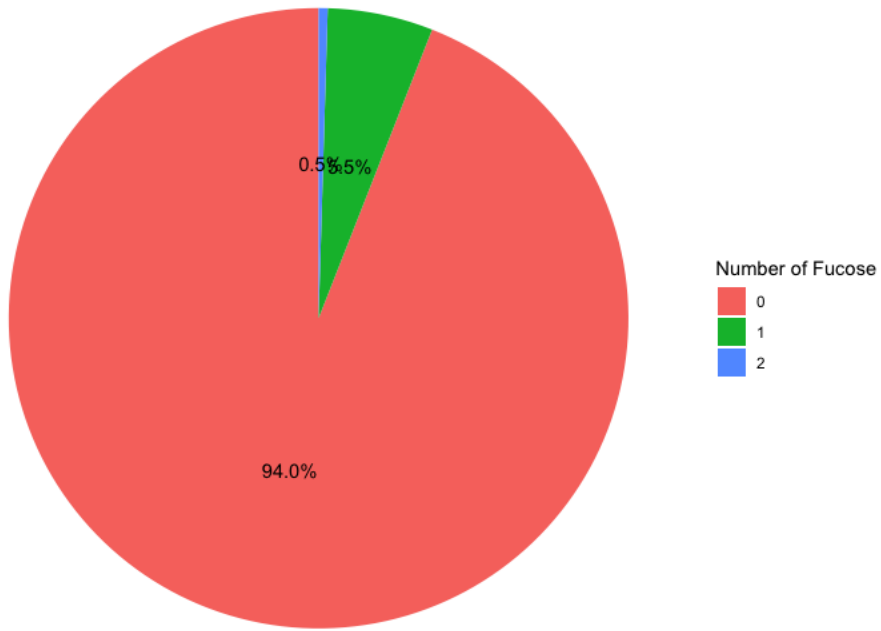

Supplementary Figure 5: Speed of Each Glycoproteomic Search

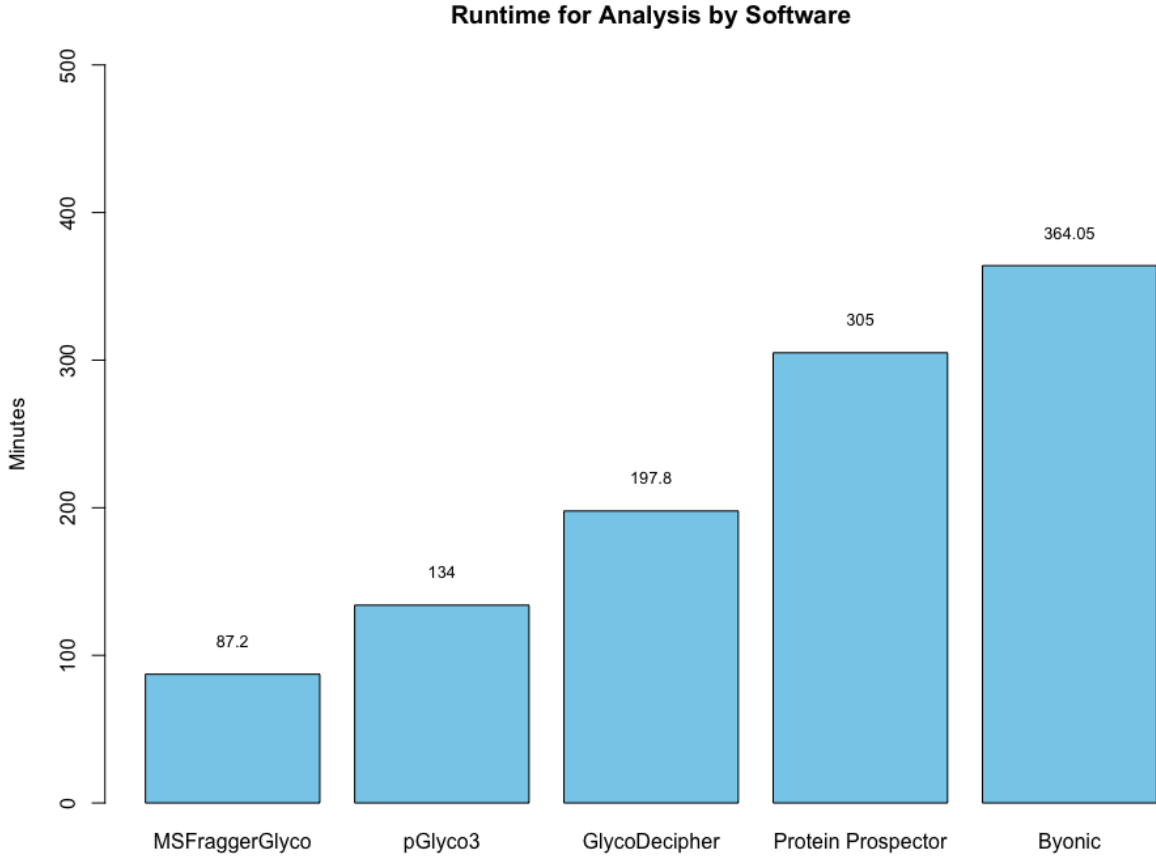

**Supplementary Figure 6: Mass Error of Peptides Detected in Byonic**

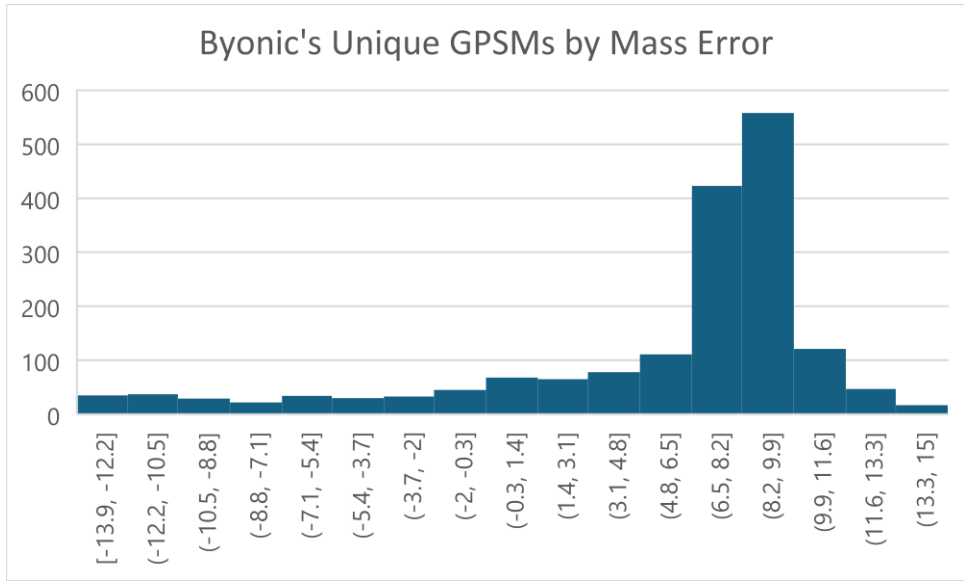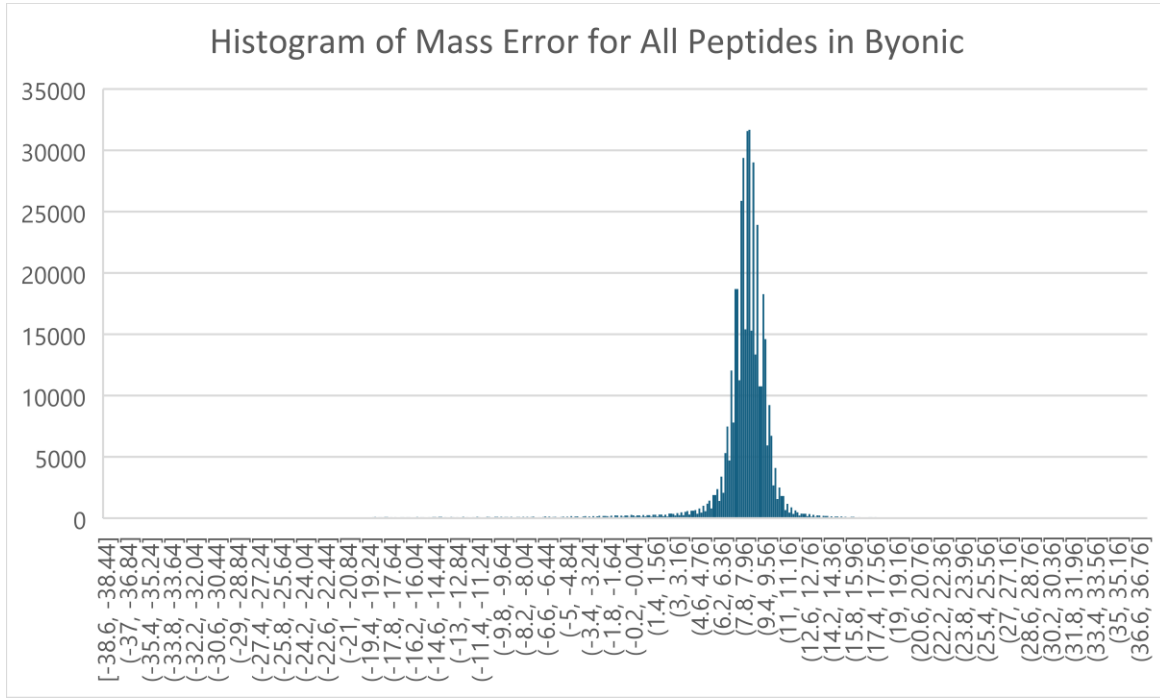

Supplement: media-1.pdf [file media-1.pdf]
